# Supplementary material
Source: PubMed Central journal article supplement (PMC7768778)
Supplement: pnas.2017094117.sapp.pdf [file pnas.2017094117.sapp.pdf]

Supplementary Information for

**Intergenerational transfer of DNA methylation marks in the honey bee**

Boris Yagound, Emily J. Remnant, Gabriele Buchmann and Benjamin P. Oldroyd

Correspondence: Boris Yagound  
Email: [boris.yagound@sydney.edu.au](mailto:boris.yagound@sydney.edu.au)

**This PDF file includes:**

Figures S1 to S14  
Table S1  
Legend for Dataset S1

**Other supplementary materials for this manuscript include the following:**

Dataset S1

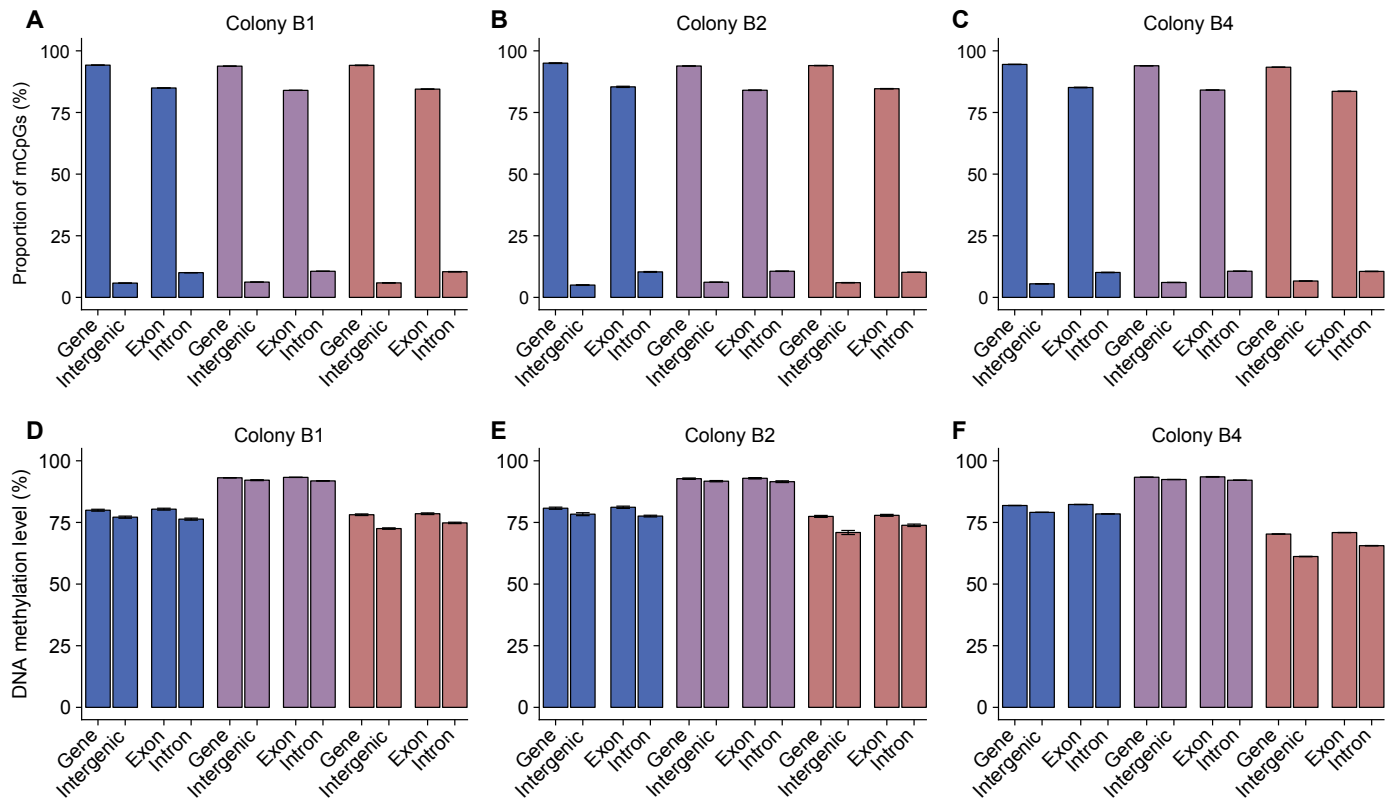

**Fig. S1. DNA methylation patterns in various genomic contexts in drones, semen and workers. (A–C)** Proportion of mCpGs (%) in various genomic contexts across all patriline for drone (blue), semen (purple) and worker (red) samples in colony B1 (A), B2 (B) and B4 (C). (D–F) DNA methylation level (% of C out of (C+T) at each CpG site) of mCpGs across all patriline for drone (blue), semen (purple) and worker (red) samples in colony B1 (D), B2 (E) and B4 (F). Bar plots represent mean  $\pm$  SE.

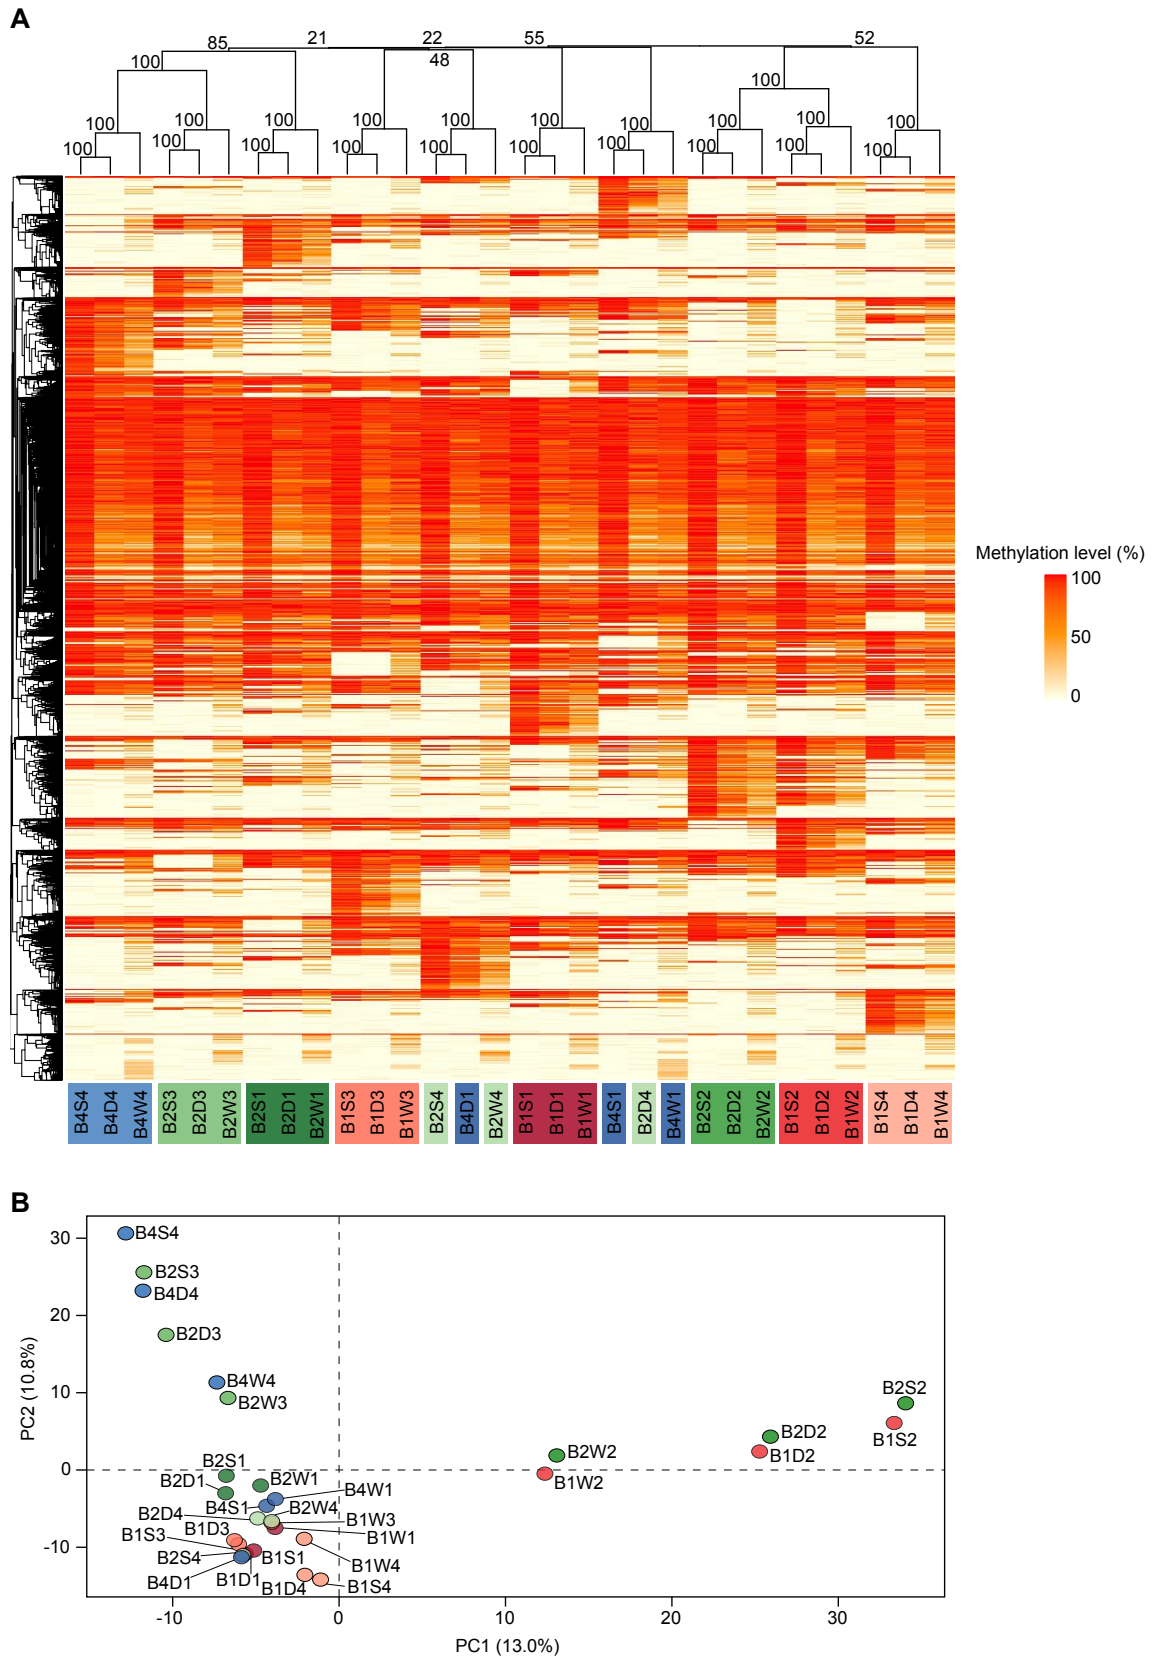

**Fig. S2. Clustering of samples according to their methylation status across all colonies. (A)** Hierarchical clustering (average agglomerative method on correlation distances) of methylation status of all shared mCpGs across all patriline and all colonies for drone (D), semen (S) and worker (W) samples. Bootstrap support values (%) are depicted above each node. Heatmap shows the level of DNA methylation for each site (ranging from 0%, yellow to 100%, red). **(B)** Principal component analysis (PCA) of DNA methylation level of all shared mCpGs across all patriline and all colonies for drone (D), semen (S) and worker (W) samples. Percentage of variance explained is depicted on each axis. Different colors represent different patriline.

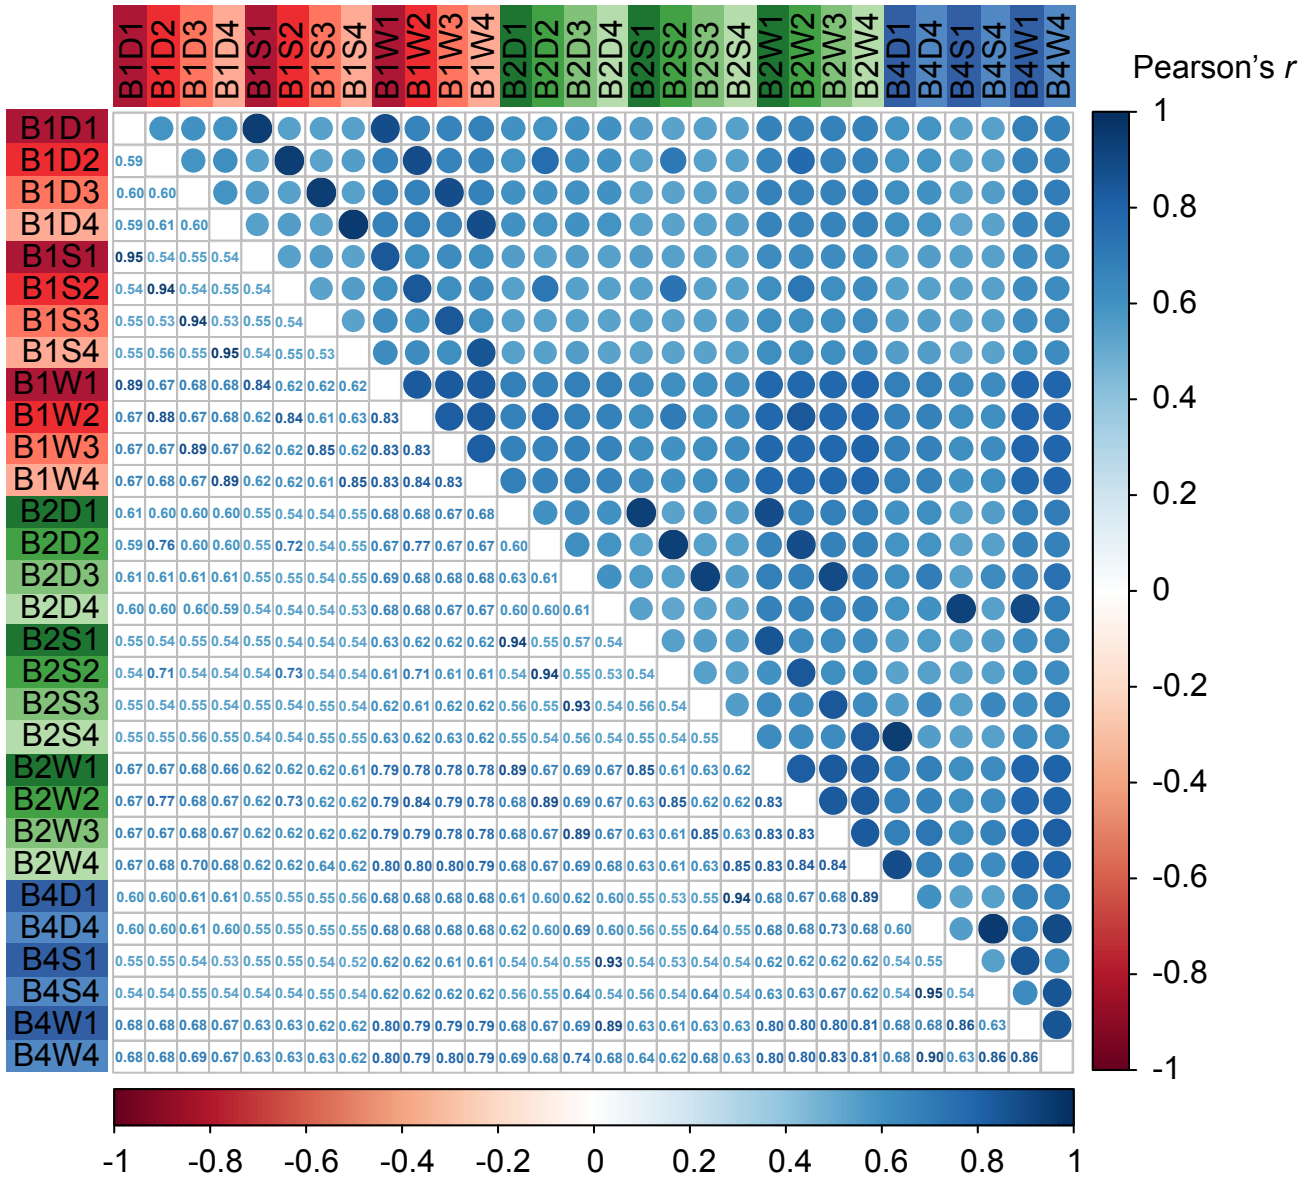

**Fig. S3. Correlogram of methylation patterns between all samples across all colonies.** Correlation (Pearson's  $r$ ) of DNA methylation levels between all pairwise sample comparisons (all  $p < 0.00001$ ). The color and size of the circles in the upper panel are proportional to the value of the Pearson product-moment correlation coefficient depicted in the lower panel (ranging from  $-1$ , dark red to  $1$ , dark blue). Patriline groups are represented by different colors.

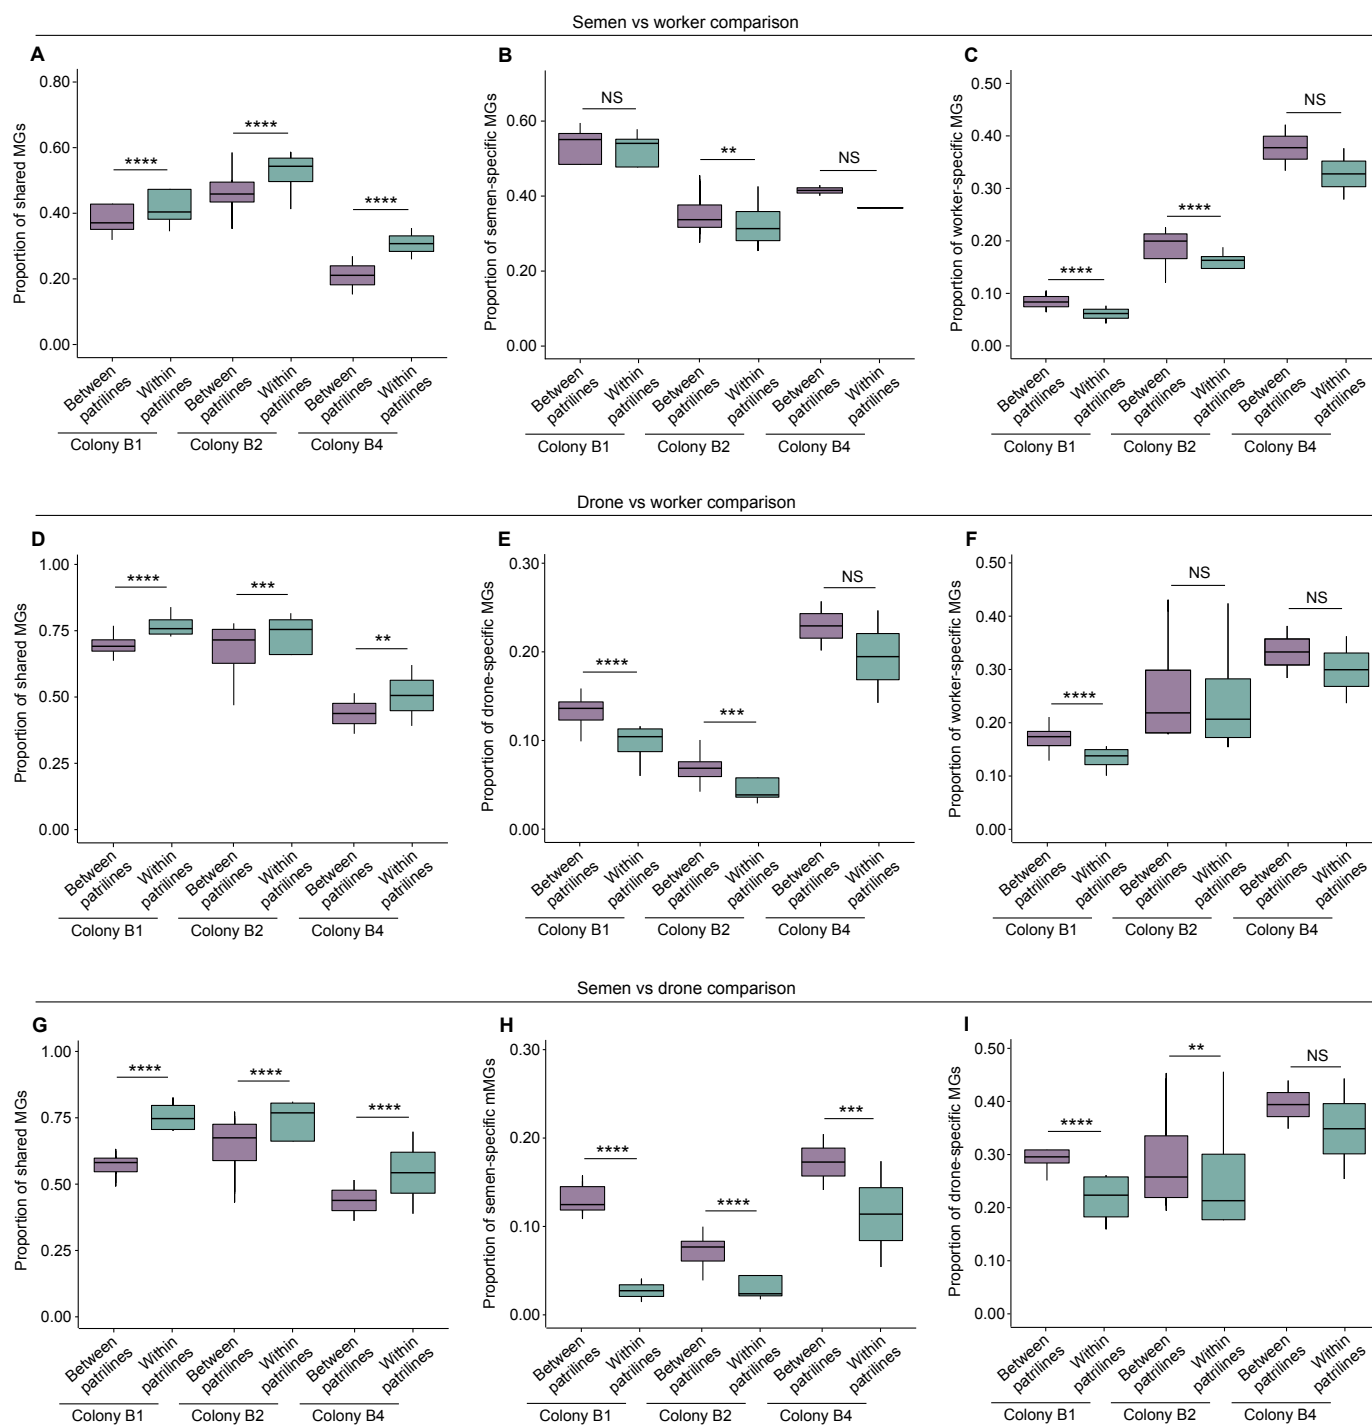

**Fig. S4. Overlap of methylated genes (MGs) within and between patrines in colonies B1, B2 and B4.** (A–C) Semen vs worker comparison showing the proportion of (A) shared MGs, (B) semen-specific MGs and (C) worker-specific MGs. (D–F) Drone vs worker comparison showing the proportion of (D) shared MGs, (E) drone-specific MGs and (F) worker-specific MGs. (G–I) Semen vs drone comparison showing the proportion of (G) shared MGs, (H) semen-specific MGs and (I) drone-specific MGs. Box plots represent median, interquartile range (IQR) and  $1.5 \times$  IQR. GLMMs: NS, not significant; \*\*,  $p < 0.01$ ; \*\*\*,  $p < 0.001$ ; \*\*\*\*,  $p < 0.0001$ .

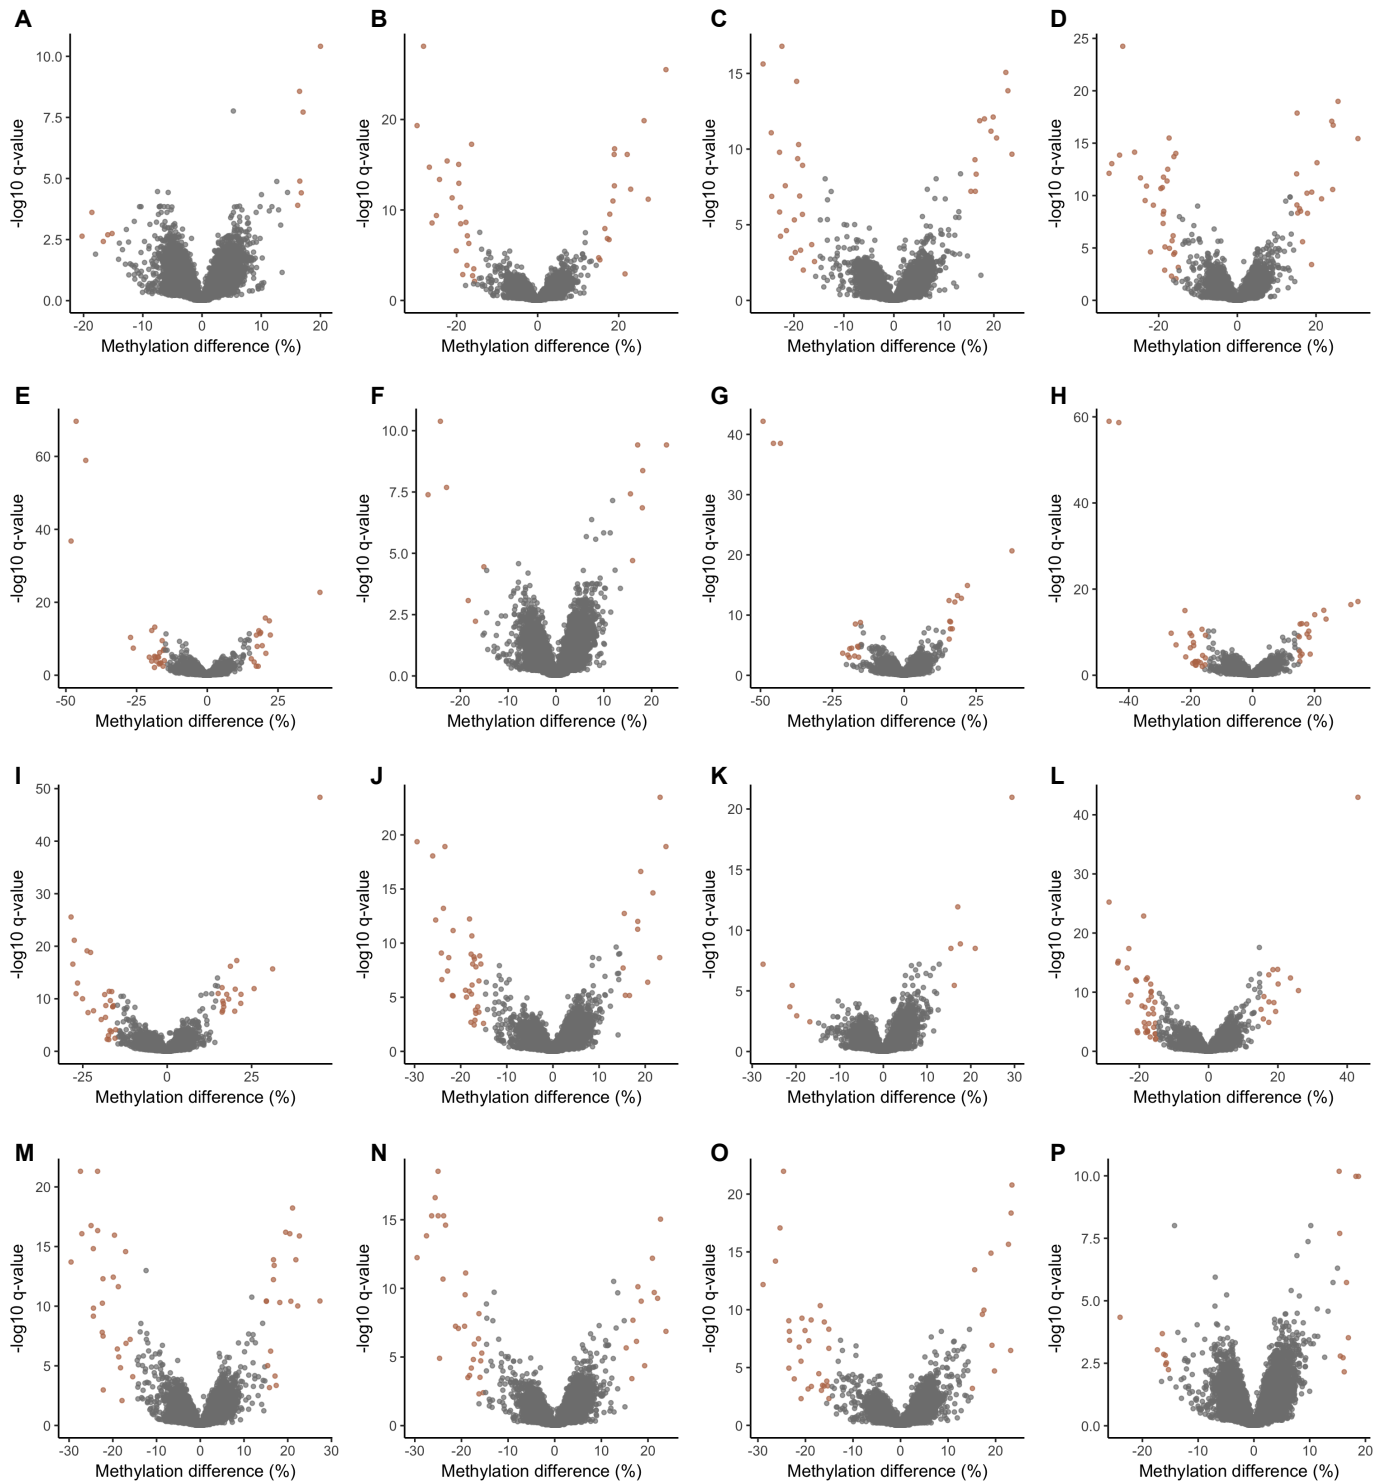

**Fig. S5. Differential methylation between each semen and worker sample pairwise comparison in colony B1.** (A–D) Semen sample from patriline 1 versus worker sample from patriline 1 (A), 2 (B), 3 (C) and 4 (D). (E–H) Semen sample from patriline 2 versus worker sample from patriline 1 (E), 2 (F), 3 (G) and 4 (H). (I–L) Semen sample from patriline 3 versus worker sample from patriline 1 (I), 2 (J), 3 (K) and 4 (L). (M–P) Semen sample from patriline 4 versus worker sample from patriline 1 (M), 2 (N), 3 (O) and 4 (P). Volcano plots represent DMRs ( $q\text{-value} \leq 0.01$ , methylation difference  $\geq 15\%$ ; orange dots) and non-significant regions (grey dots).

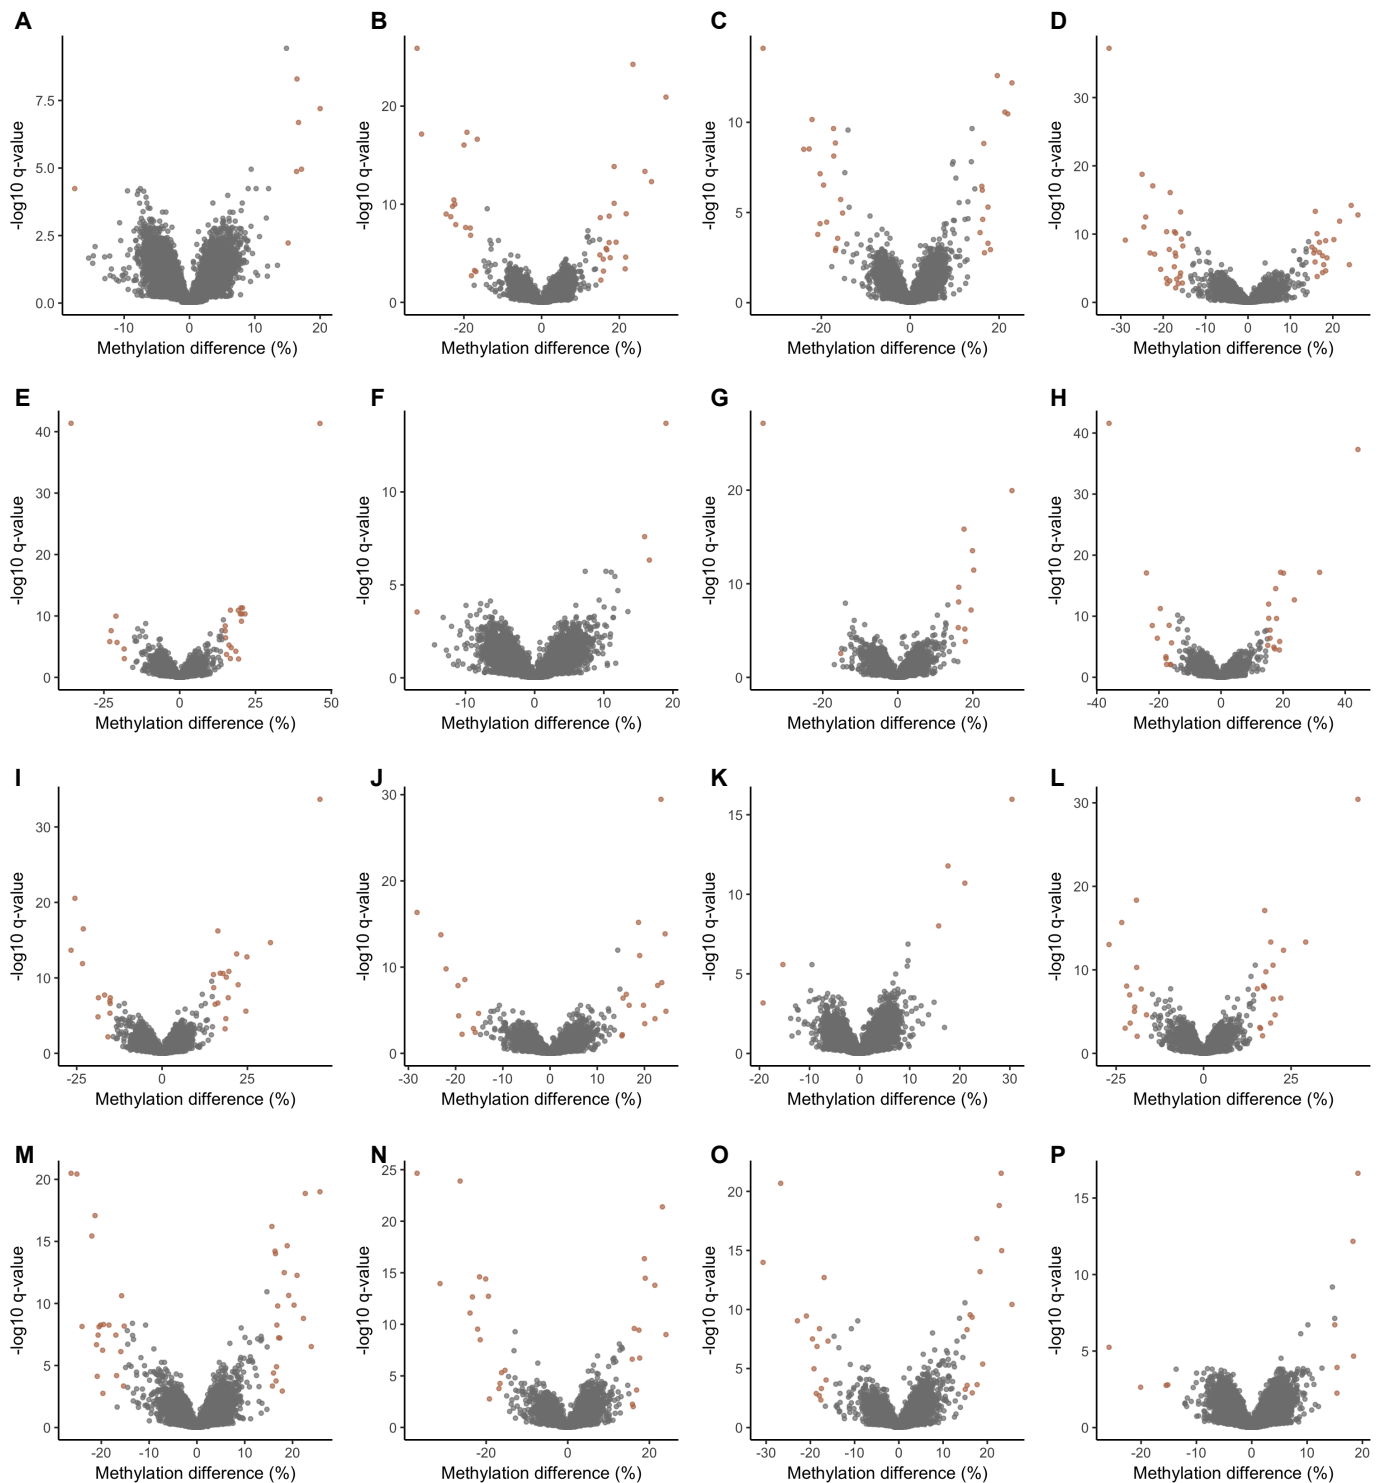

**Fig. S6. Differential methylation between each drone and worker sample pairwise comparison in colony B1. (A–D)** Drone sample from patriline 1 versus worker sample from patriline 1 (A), 2 (B), 3 (C) and 4 (D). (E–H) Drone sample from patriline 2 versus worker sample from patriline 1 (E), 2 (F), 3 (G) and 4 (H). (I–L) Drone sample from patriline 3 versus worker sample from patriline 1 (I), 2 (J), 3 (K) and 4 (L). (M–P) Drone sample from patriline 4 versus worker sample from patriline 1 (M), 2 (N), 3 (O) and 4 (P). Volcano plots represent DMRs ( $q\text{-value} \leq 0.01$ , methylation difference  $\geq 15\%$ ; orange dots) and non-significant regions (grey dots).

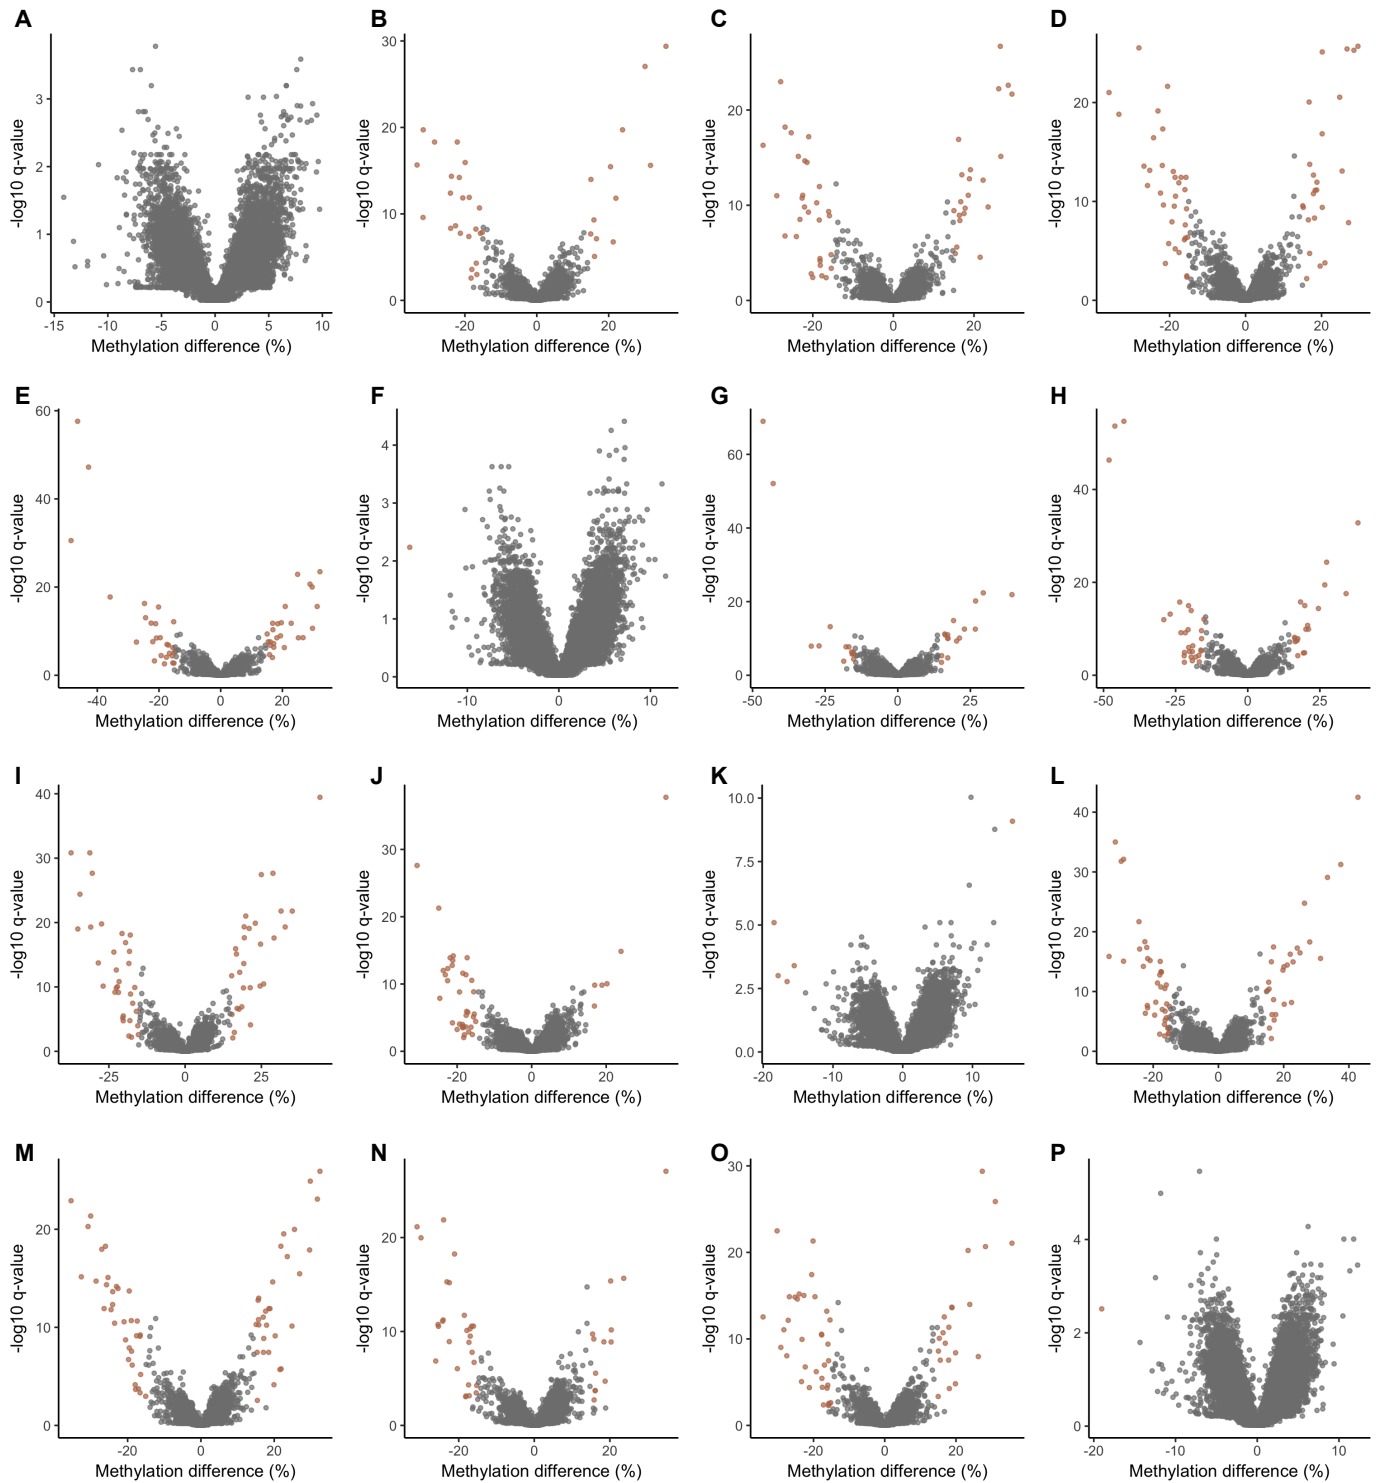

**Fig. S7. Differential methylation between each semen and drone sample pairwise comparison in colony B1. (A–D)** Semen sample from patriline 1 versus drone sample from patriline 1 (A), 2 (B), 3 (C) and 4 (D). (E–H) Semen sample from patriline 2 versus drone sample from patriline 1 (E), 2 (F), 3 (G) and 4 (H). (I–L) Semen sample from patriline 3 versus drone sample from patriline 1 (I), 2 (J), 3 (K) and 4 (L). (M–P) Semen sample from patriline 4 versus drone sample from patriline 1 (M), 2 (N), 3 (O) and 4 (P). Volcano plots represent DMRs ( $q$ -value  $\leq 0.01$ , methylation difference  $\geq 15\%$ ; orange dots) and non-significant regions (grey dots).



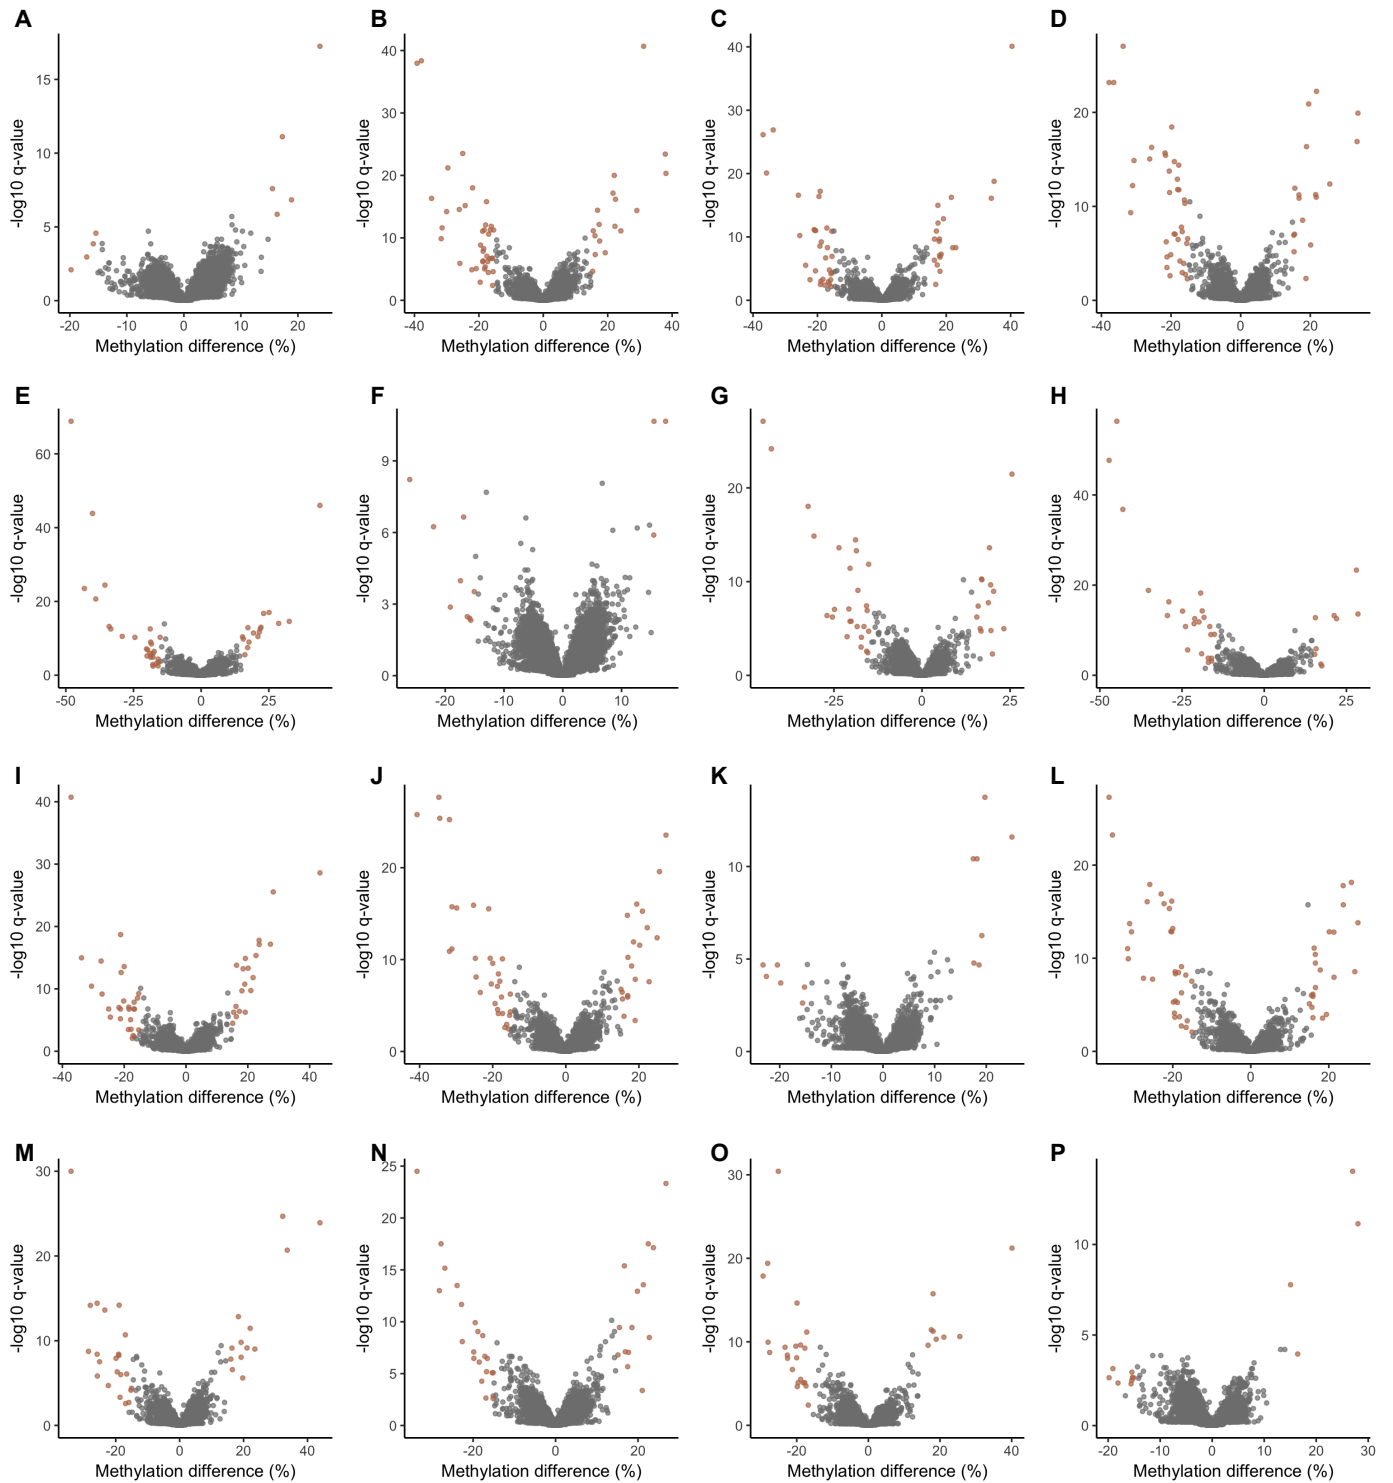

**Fig. S8. Differential methylation between each semen and worker sample pairwise comparison in colony B2.** (A–D) Semen sample from patriline 1 versus worker sample from patriline 1 (A), 2 (B), 3 (C) and 4 (D). (E–H) Semen sample from patriline 2 versus worker sample from patriline 1 (E), 2 (F), 3 (G) and 4 (H). (I–L) Semen sample from patriline 3 versus worker sample from patriline 1 (I), 2 (J), 3 (K) and 4 (L). (M–P) Semen sample from patriline 4 versus worker sample from patriline 1 (M), 2 (N), 3 (O) and 4 (P). Volcano plots represent DMRs ( $q\text{-value} \leq 0.01$ , methylation difference  $\geq 15\%$ ; orange dots) and non-significant regions (grey dots).

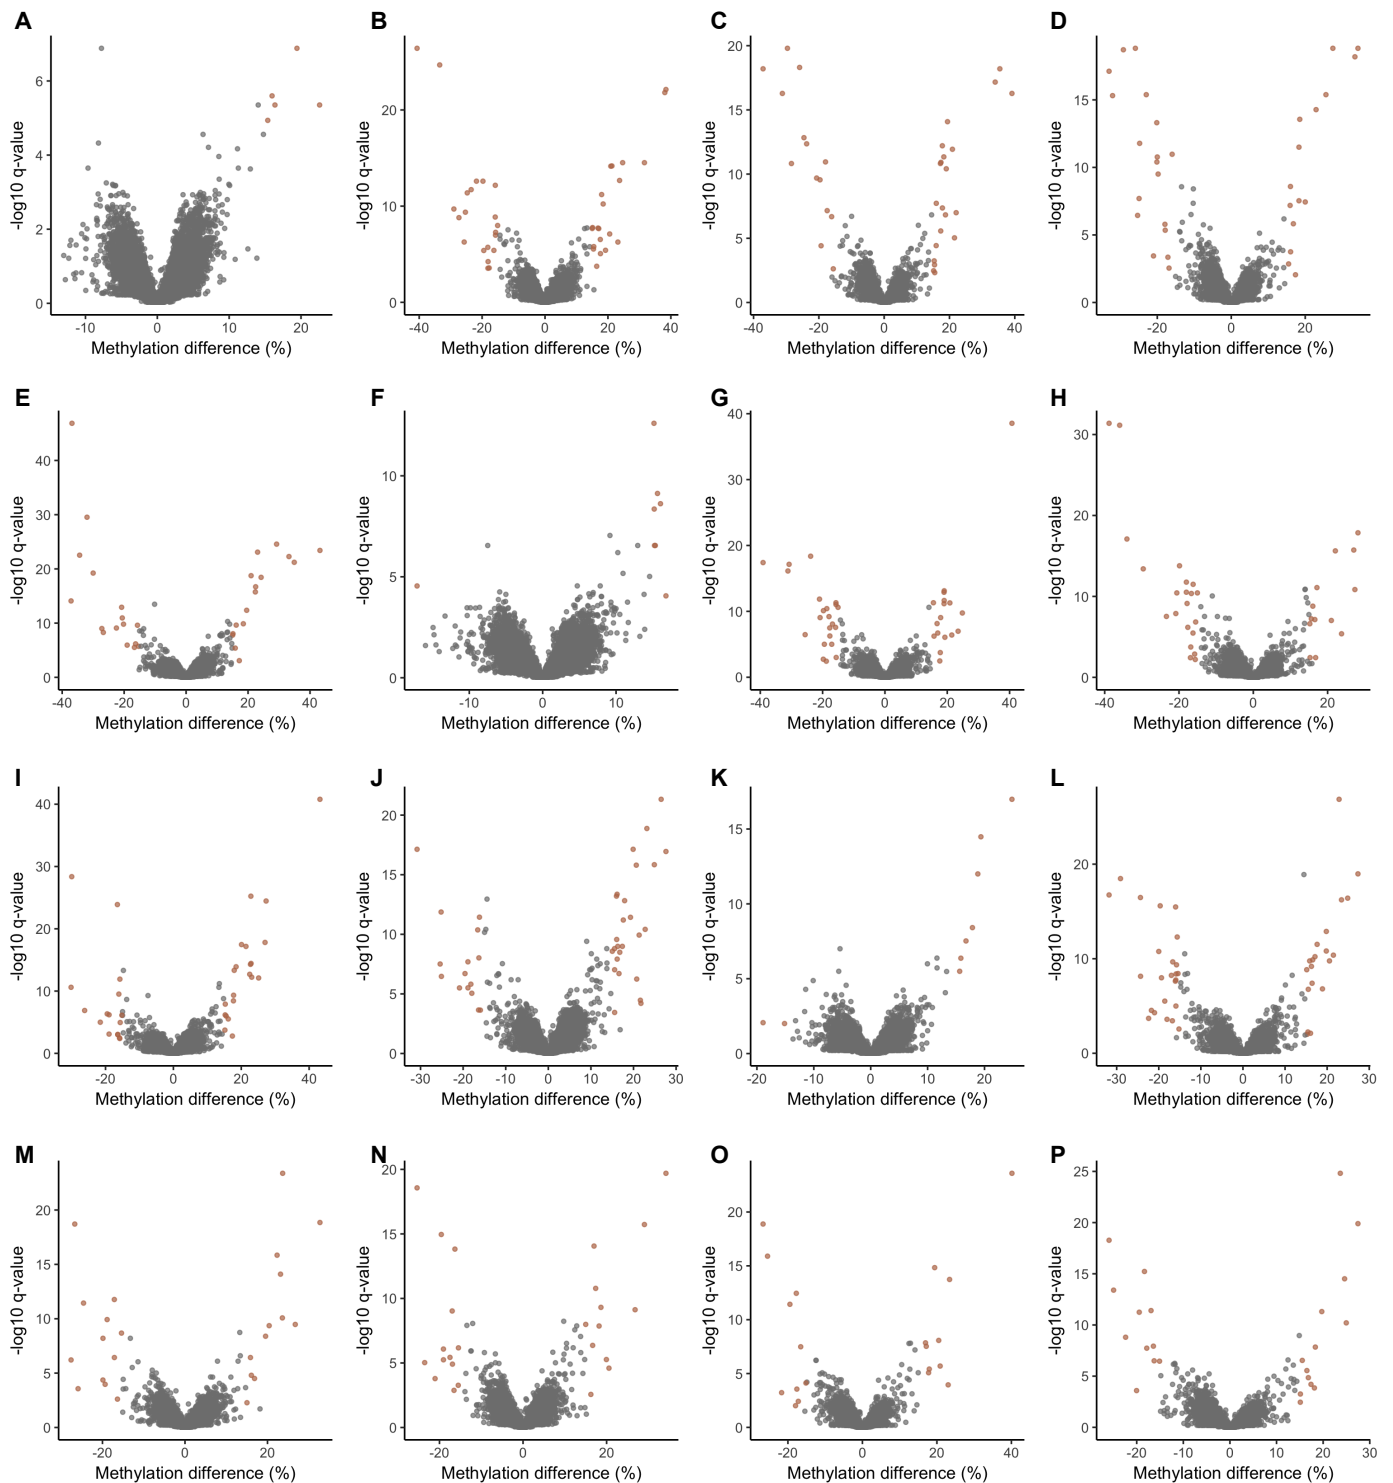

**Fig. S9. Differential methylation between each drone and worker sample pairwise comparison in colony B2. (A–D)** Drone sample from patriline 1 versus worker sample from patriline 1 (A), 2 (B), 3 (C) and 4 (D). (E–H) Drone sample from patriline 2 versus worker sample from patriline 1 (E), 2 (F), 3 (G) and 4 (H). (I–L) Drone sample from patriline 3 versus worker sample from patriline 1 (I), 2 (J), 3 (K) and 4 (L). (M–P) Drone sample from patriline 4 versus worker sample from patriline 1 (M), 2 (N), 3 (O) and 4 (P). Volcano plots represent DMRs ( $q$ -value  $\leq 0.01$ , methylation difference  $\geq 15\%$ ; orange dots) and non-significant regions (grey dots).

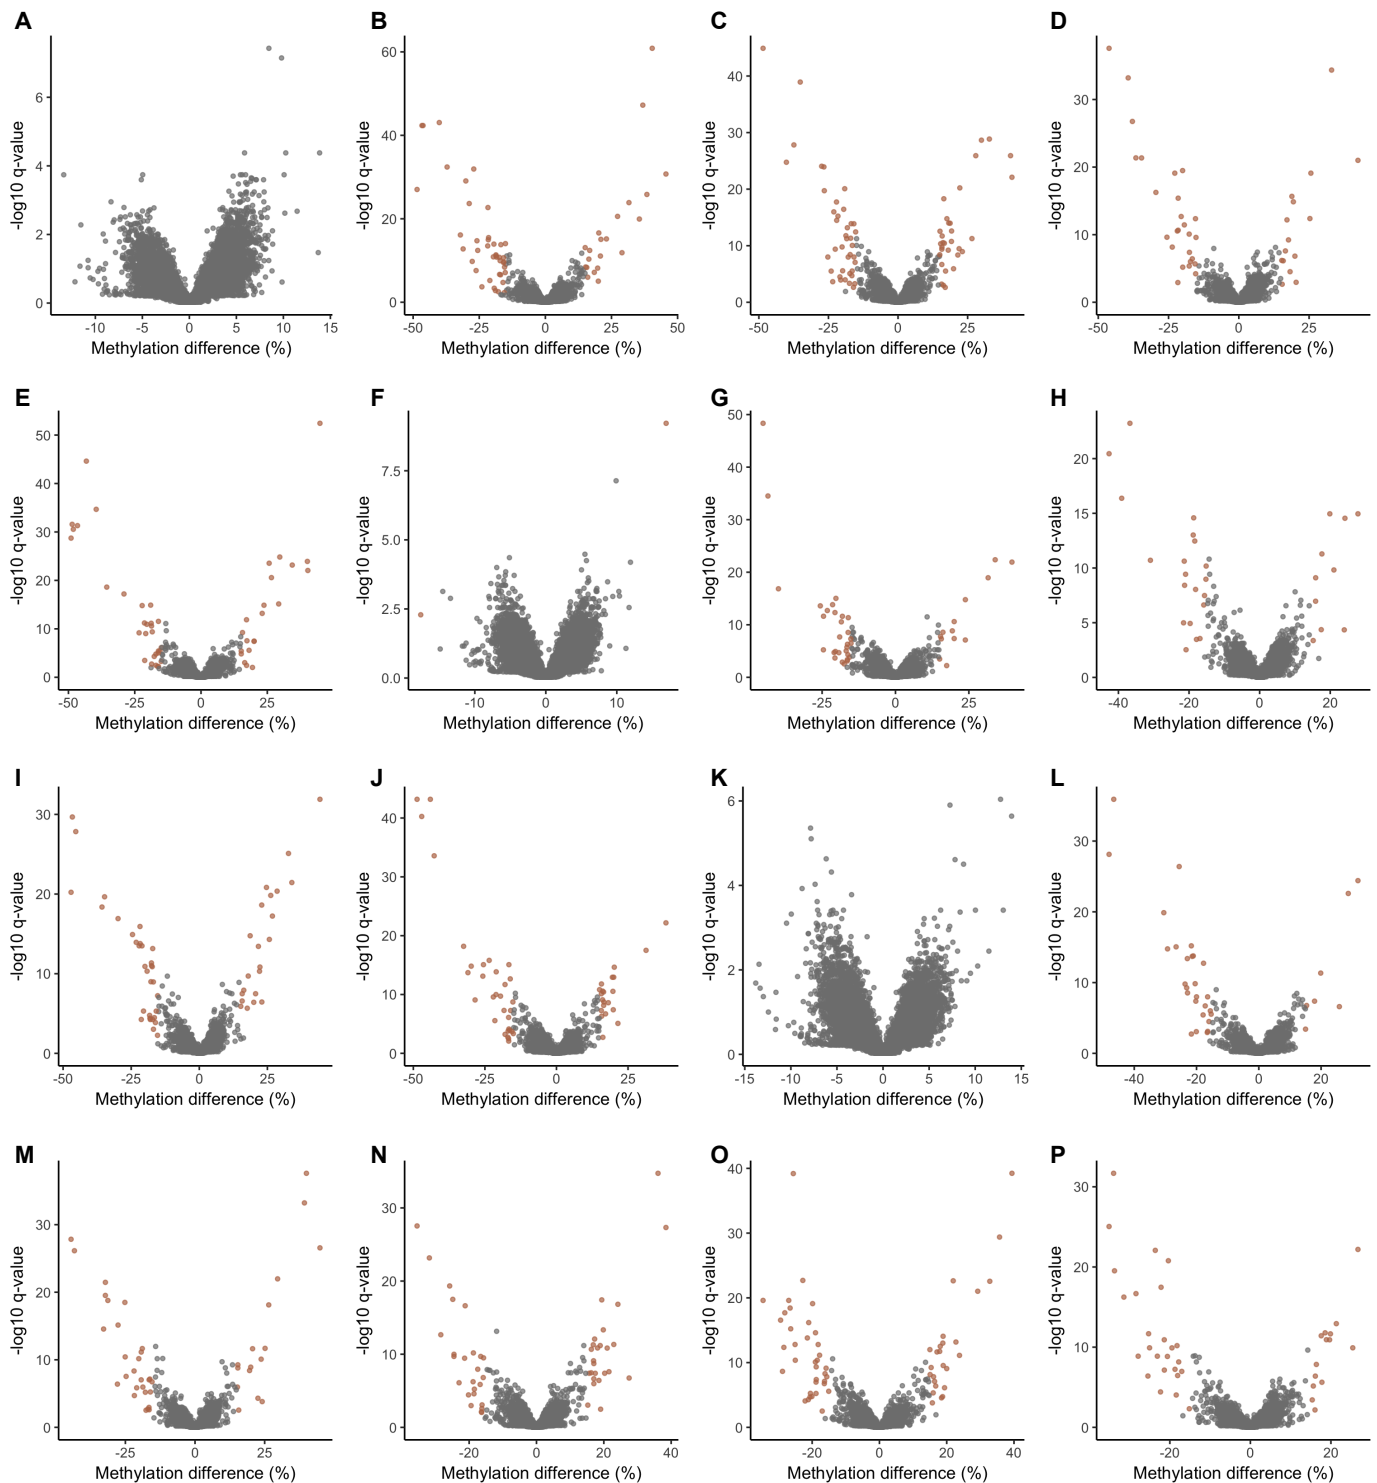

**Fig. S10. Differential methylation between each semen and drone sample pairwise comparison in colony B2.** (A–D) Semen sample from patriline 1 versus drone sample from patriline 1 (A), 2 (B), 3 (C) and 4 (D). (E–H) Semen sample from patriline 2 versus drone sample from patriline 1 (E), 2 (F), 3 (G) and 4 (H). (I–L) Semen sample from patriline 3 versus drone sample from patriline 1 (I), 2 (J), 3 (K) and 4 (L). (M–P) Semen sample from patriline 4 versus drone sample from patriline 1 (M), 2 (N), 3 (O) and 4 (P). Volcano plots represent DMRs ( $q\text{-value} \leq 0.01$ , methylation difference  $\geq 15\%$ ; orange dots) and non-significant regions (grey dots).

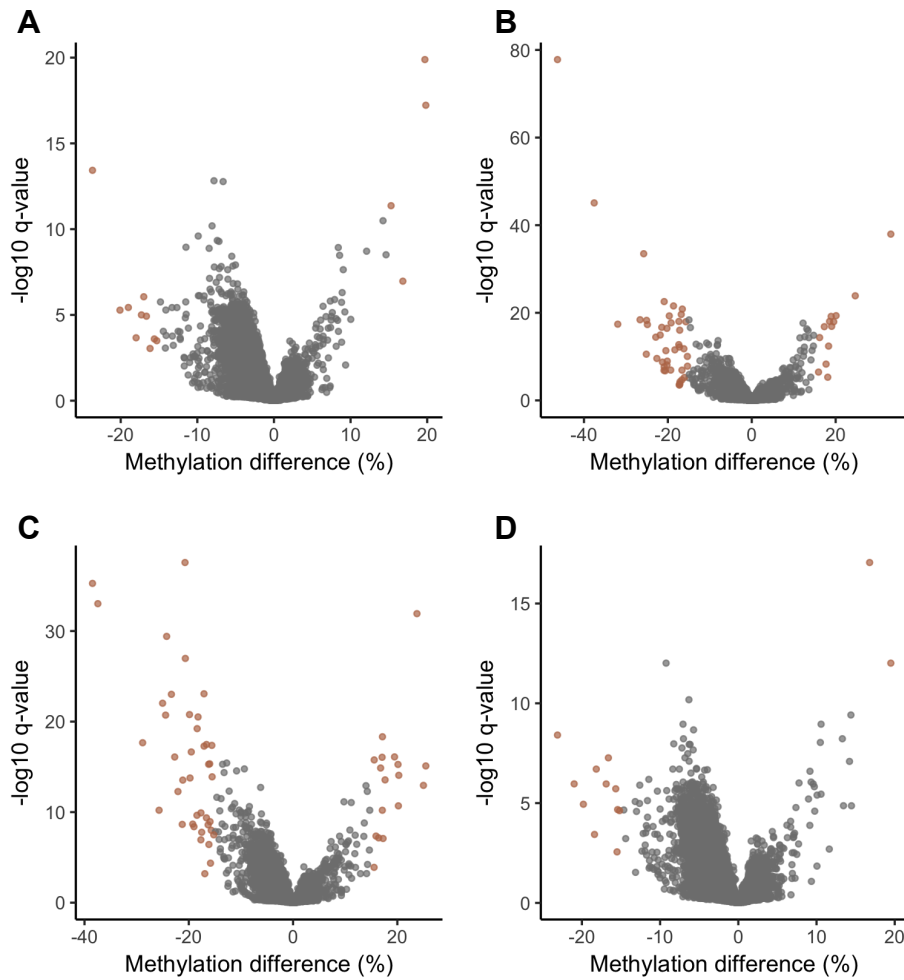

**Fig. S11. Differential methylation between each semen and worker sample pairwise comparison in colony B4.** (A,B) Semen sample from patriline 1 versus worker sample from patriline 1 (A) and 4 (B). (C,D) Semen sample from patriline 4 versus worker sample from patriline 1 (C) and 4 (D). Volcano plots represent DMRs ( $q\text{-value} \leq 0.01$ , methylation difference  $\geq 15\%$ ; orange dots) and non-significant regions (grey dots).

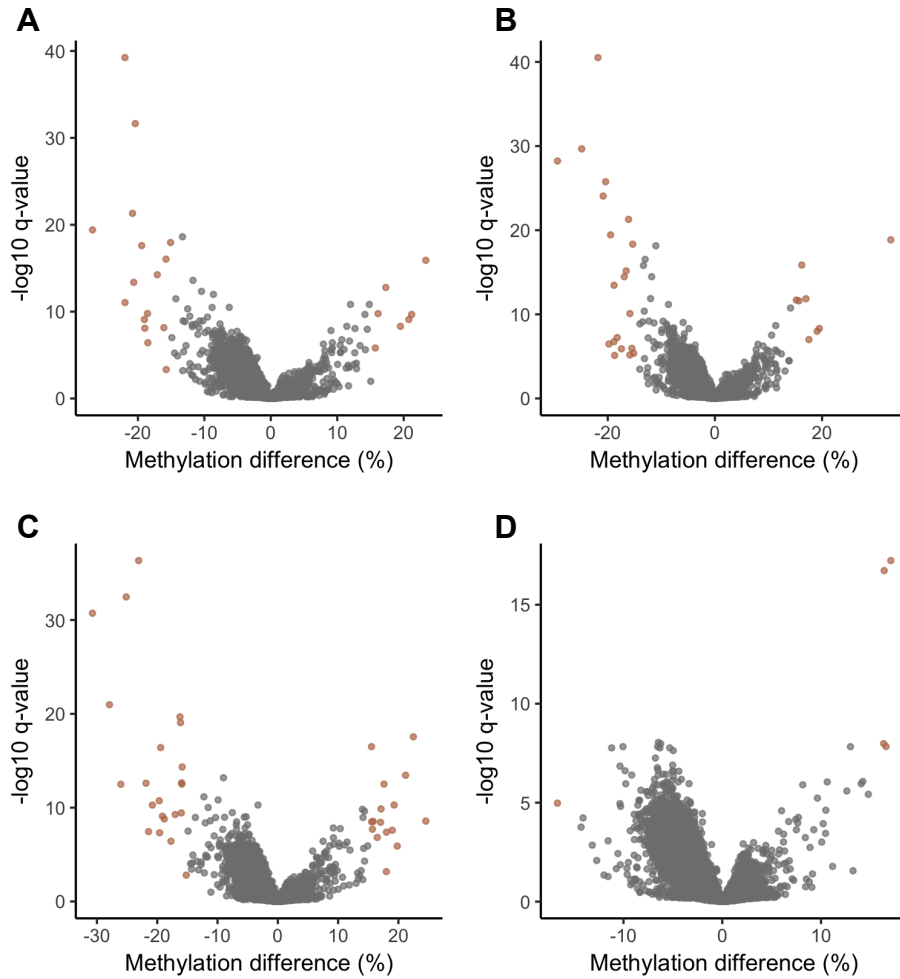

**Fig. S12. Differential methylation between each drone and worker sample pairwise comparison in colony B4.** (A,B) Drone sample from patriline 1 versus worker sample from patriline 1 (A) and 4 (B). (C,D) Drone sample from patriline 4 versus worker sample from patriline 1 (C) and 4 (D). Volcano plots represent DMRs ( $q\text{-value} \leq 0.01$ , methylation difference  $\geq 15\%$ ; orange dots) and non-significant regions (grey dots).

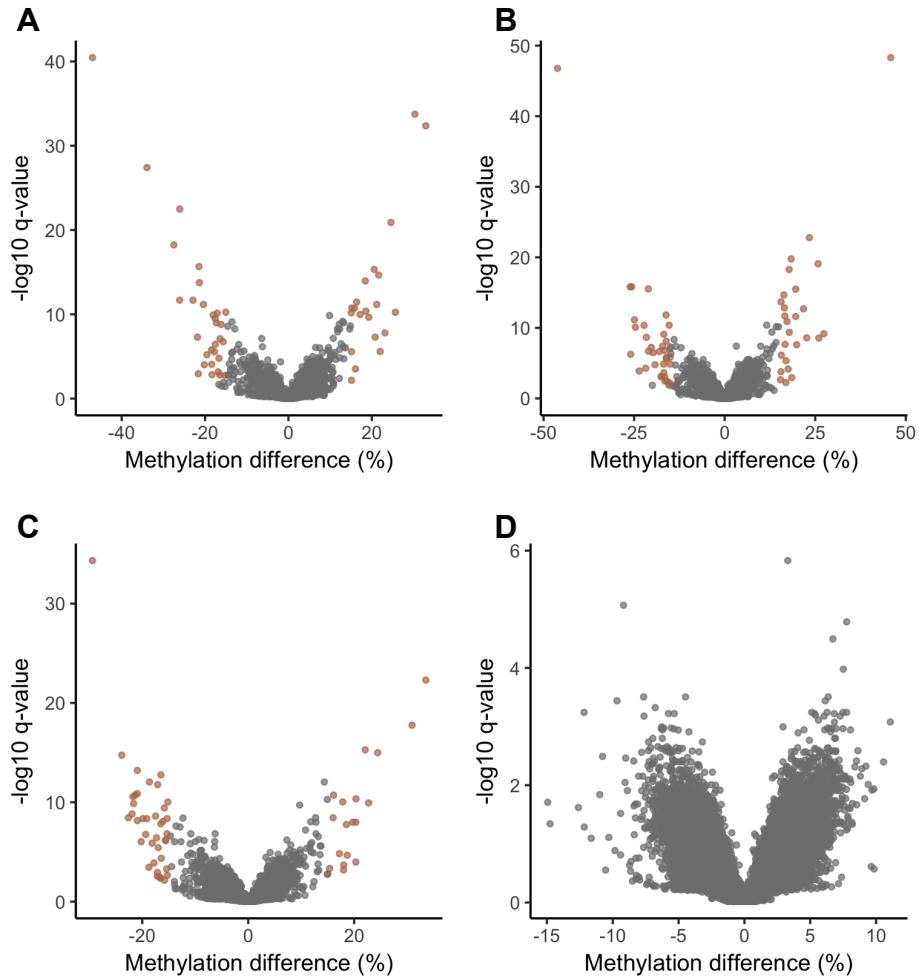

**Fig. S13. Differential methylation between each semen and drone sample pairwise comparison in colony B4.** (A,B) Semen sample from patriline 1 versus drone sample from patriline 1 (A) and 4 (B). (C,D) Semen sample from patriline 4 versus drone sample from patriline 1 (C) and 4 (D). Volcano plots represent DMRs ( $q\text{-value} \leq 0.01$ , methylation difference  $\geq 15\%$ ; orange dots) and non-significant regions (grey dots).

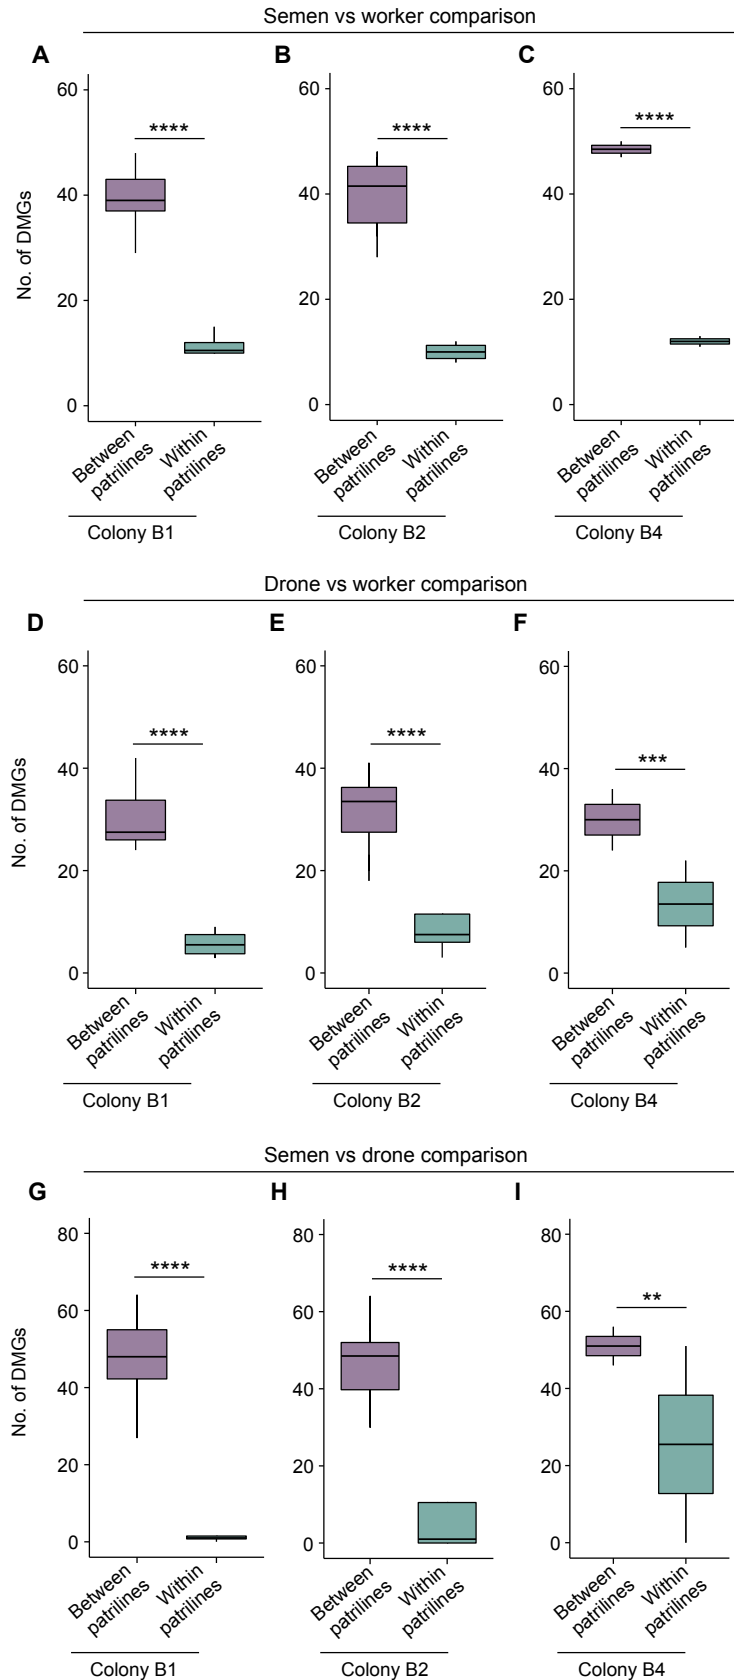

**Fig. S14. Differentially methylated genes (DMGs) within and between patriline.** (A–C) Number of DMGs between semen and workers from different patriline and from the same patriline in colony B1 (A), B2 (B) and B4 (C). (D–F) Number of DMGs between drones and workers from different patriline and from the same patriline in colony B1 (D), B2 (E) and B4 (F). (G–I) Number of DMGs between semen and drones from different patriline and from the same patriline in colony B1 (G), B2 (H) and B4 (I). Box plots represent median, interquartile range (IQR) and  $1.5 \times$  IQR. \*\*,  $p < 0.01$ ; \*\*\*,  $p < 0.001$ ; \*\*\*\*,  $p < 0.0001$ .

**Table S1. Sequencing statistics.**

| Sample | Colony | Caste  | Tissue | Conversion efficiency (%) | Mapping efficiency (%) | Genome coverage | No. sufficiently covered CpGs | No. mCpGs | Methylation density (%) | Methylation level (%) |
|--------|--------|--------|--------|---------------------------|------------------------|-----------------|-------------------------------|-----------|-------------------------|-----------------------|
| B1S1   | B1     | Drone  | Semen  | 99.45                     | 74.22                  | 29.34           | 6,179,883                     | 58,610    | 0.95                    | 93.04 ± 0.04          |
| B1S2   | B1     | Drone  | Semen  | 99.41                     | 77.01                  | 27.60           | 6,252,003                     | 59,062    | 0.94                    | 93.10 ± 0.04          |
| B1S3   | B1     | Drone  | Semen  | 99.46                     | 77.68                  | 32.90           | 7,483,205                     | 63,556    | 0.85                    | 92.91 ± 0.04          |
| B1S4   | B1     | Drone  | Semen  | 99.44                     | 76.96                  | 30.01           | 6,957,427                     | 59,721    | 0.86                    | 93.16 ± 0.04          |
| B1D1   | B1     | Drone  | Thorax | 99.51                     | 78.32                  | 23.96           | 5,588,461                     | 51,860    | 0.93                    | 80.89 ± 0.07          |
| B1D2   | B1     | Drone  | Thorax | 99.48                     | 74.38                  | 23.99           | 5,496,463                     | 52,458    | 0.95                    | 79.61 ± 0.07          |
| B1D3   | B1     | Drone  | Thorax | 99.47                     | 71.73                  | 26.07           | 6,098,613                     | 55,729    | 0.91                    | 79.03 ± 0.07          |
| B1D4   | B1     | Drone  | Thorax | 99.47                     | 75.90                  | 28.21           | 6,735,804                     | 56,580    | 0.84                    | 79.63 ± 0.07          |
| B1W1   | B1     | Worker | Thorax | 99.45                     | 71.36                  | 24.34           | 6,589,359                     | 47,943    | 0.73                    | 77.16 ± 0.09          |
| B1W2   | B1     | Worker | Thorax | 99.43                     | 66.86                  | 23.20           | 5,780,150                     | 47,329    | 0.82                    | 77.61 ± 0.08          |
| B1W3   | B1     | Worker | Thorax | 99.40                     | 70.51                  | 22.55           | 5,457,224                     | 46,051    | 0.84                    | 78.68 ± 0.08          |
| B1W4   | B1     | Worker | Thorax | 99.38                     | 70.63                  | 25.55           | 6,547,916                     | 53,618    | 0.82                    | 77.73 ± 0.08          |
| B2S1   | B2     | Drone  | Semen  | 99.43                     | 78.83                  | 30.78           | 7,065,952                     | 61,958    | 0.88                    | 92.09 ± 0.04          |
| B2S2   | B2     | Drone  | Semen  | 99.45                     | 79.35                  | 26.25           | 6,109,971                     | 57,810    | 0.95                    | 93.36 ± 0.04          |
| B2S3   | B2     | Drone  | Semen  | 99.45                     | 77.57                  | 27.11           | 5,937,051                     | 57,227    | 0.96                    | 92.44 ± 0.04          |
| B2S4   | B2     | Drone  | Semen  | 99.45                     | 80.04                  | 26.81           | 5,964,465                     | 56,514    | 0.95                    | 92.85 ± 0.04          |
| B2D1   | B2     | Drone  | Thorax | 99.51                     | 66.33                  | 22.27           | 5,591,105                     | 39,941    | 0.71                    | 81.17 ± 0.08          |
| B2D2   | B2     | Drone  | Thorax | 99.44                     | 61.86                  | 22.89           | 6,360,013                     | 40,902    | 0.64                    | 80.89 ± 0.07          |
| B2D3   | B2     | Drone  | Thorax | 99.56                     | 70.25                  | 24.31           | 6,726,369                     | 45,729    | 0.68                    | 79.33 ± 0.08          |
| B2D4   | B2     | Drone  | Thorax | 99.52                     | 59.31                  | 19.95           | 4,981,330                     | 32,505    | 0.65                    | 81.19 ± 0.08          |
| B2W1   | B2     | Worker | Thorax | 99.38                     | 72.34                  | 24.11           | 5,594,500                     | 54,894    | 0.98                    | 78.22 ± 0.08          |
| B2W2   | B2     | Worker | Thorax | 99.41                     | 73.29                  | 26.76           | 6,564,152                     | 59,548    | 0.91                    | 76.69 ± 0.08          |
| B2W3   | B2     | Worker | Thorax | 99.45                     | 74.62                  | 24.45           | 5,966,357                     | 56,855    | 0.95                    | 77.07 ± 0.08          |
| B2W4   | B2     | Worker | Thorax | 99.54                     | 74.06                  | 24.62           | 6,238,512                     | 56,700    | 0.91                    | 76.22 ± 0.08          |
| B4S1   | B4     | Drone  | Semen  | 99.46                     | 82.74                  | 27.40           | 6,845,163                     | 62,039    | 0.91                    | 92.99 ± 0.04          |
| B4S4   | B4     | Drone  | Semen  | 99.39                     | 82.18                  | 27.02           | 6,497,011                     | 60,242    | 0.93                    | 93.56 ± 0.03          |
| B4D1   | B4     | Drone  | Thorax | 99.51                     | 71.93                  | 22.72           | 5,543,042                     | 48,966    | 0.88                    | 80.79 ± 0.07          |
| B4D4   | B4     | Drone  | Thorax | 99.51                     | 68.56                  | 23.29           | 5,810,610                     | 52,502    | 0.90                    | 82.64 ± 0.06          |
| B4W1   | B4     | Worker | Thorax | 99.52                     | 73.99                  | 55.81           | 9,035,583                     | 73,236    | 0.81                    | 69.50 ± 0.09          |
| B4W4   | B4     | Worker | Thorax | 99.53                     | 73.28                  | 55.69           | 8,989,812                     | 73,937    | 0.82                    | 69.86 ± 0.09          |



**Dataset S1 (separate file).** Genotypes at five microsatellite loci of all drones, queens (inferred) and workers in each patriline in colonies B1, B2 and B4.
